## WBPHCOT FIELD-BASED OBSERVATION DATA COLLECTION FORM

*To the Observer:*

*Do not begin the interview unless all WBPHCOT team members being observed today have agreed to be part of the field-based observation*

Did all WBPHCOT team members agree to participate?

If YES, please check box

If NO, please check box and **STOP** the field-based observation

|                                      |  |
|--------------------------------------|--|
| Yes, all team members agreed         |  |
| No, at least one team member refused |  |

**OBSERVER: PLEASE FILL OUT THIS SECTION (QUESTIONS 100-107) BEFORE BEGINNING TIME MOTION DOCUMENTATION.**

**100.** Observer Code: \_\_\_\_\_

**101.** Date: \_\_\_\_ / \_\_\_\_ / \_\_\_\_

**102.** Name of District: \_\_\_\_\_

**103.** Name of WBPHCOT Health Facility: \_\_\_\_\_

**104.** Ward Number: \_\_\_\_\_

**105.** How many CHWs are on the team/being observed today? \_\_\_\_\_

**106.** How many OTLs are on the team/being observed today? \_\_\_\_\_

**107.** Is anyone else (other than yourself) accompanying the team today? \_\_\_\_\_

IF YES, *specify*: \_\_\_\_\_

**Time Motion – Direct Observation**

**OBSERVER: RECORD EACH ACTIVITY OBSERVED AS A SEPARATE LINE**

**TIME-MOTION ACTIVITY CODES/TITLES**

- A. Logistics Planning**
  - 1. Planning outreach schedule for the day
  - 2. Other planning and preparatory activities
- B. Travel**
  - 1. Waiting for transportation or directions
  - 2. In transit
  - 3. Locating/identifying household (HH) or other meeting place
- C. Household visits**
  - 1. Waiting for client to arrive and/or become available
  - 2. Introduction of CHW, obtaining permission to enter HH, speaking to household members, etc.
  - 3. Time spent in/with HH
- D. Documentation**
  - 1. Completing paper-based forms
  - 2. Entering data into electronic database or mHealth application
  - 3. Other documentation activities
- E. Meetings**
  - 1. WBPHCOT team meeting
  - 2. Meeting with OTLs
  - 3. Meeting with community-level stakeholders
  - 4. Other meeting activities
- F. Other community-based activities**
- G. Other facility-based activities**
- H. Lunch Break, Coffee Break, Rest**
- I. WAITING (other than specified in B1 and C1)**
  - 1. For equipment, medications, supplies
  - 2. For people
- J. OTHER, specify\_\_\_\_\_**

# Appendix G - Field Based Observation Data Collection Form

Add a new line of data each time an activity changes. Add as many rows as necessary. All time needs to be accounted for.

| Observation Number | Activity Code (see above) | Activity Title          | Team member Involved | # of Team Members Involved | Start Time   | End Time     | Notes (see examples)                                                                                                             |
|--------------------|---------------------------|-------------------------|----------------------|----------------------------|--------------|--------------|----------------------------------------------------------------------------------------------------------------------------------|
| <i>Example:</i>    | <i>B</i>                  | <i>Travel</i>           |                      | <i>2</i>                   | <i>08:15</i> | <i>08:42</i> | <i>Visit #2 to house</i>                                                                                                         |
|                    | <i>C</i>                  | <i>HH entry</i>         |                      | <i>1</i>                   | <i>08:42</i> | <i>08:45</i> | <i>Introductions, permission to enter</i>                                                                                        |
|                    | <i>D</i>                  | <i>Time spent in HH</i> |                      | <i>1</i>                   | <i>08:45</i> | <i>09:15</i> | <i>CHW reports key activities were: BP check, adherence counselling (not directly observed) and that clients were all adults</i> |
| <b>1</b>           |                           |                         |                      |                            |              |              |                                                                                                                                  |
| <b>2</b>           |                           |                         |                      |                            |              |              |                                                                                                                                  |
| <b>3</b>           |                           |                         |                      |                            |              |              |                                                                                                                                  |

Comments:

Reflection questions:

1. What went well today?

2. Were there challenges with any of the following (*select all that apply*):

- ☐ transportation
- ☐ equipment/supplies
- ☐ locating clients
- ☐ staff availability
- ☐ staff dynamics, *specify* \_\_\_\_\_
- ☐ weather
- ☐ safety
- ☐ documentation/M&E forms
- ☐ contacting OTL or other supervisors
- ☐ other, *specify* \_\_\_\_\_
- ☐ no challenges

3. Can you describe the specific challenges that you observed today?

#### 4. What would help to address these challenges?

##### Daily activity summary

How many household visits did the CHW(s) being observed make today? \_\_\_\_\_

*Instructions:* Repeat this section for each HH visit observed

For each HH visit, please obtain the following information from the CHWs:

- Is this a new or follow-up HH visit? [*select one*]
  - New = HH not visited by the WBPHCOT in the past 12 months
  - Follow-up = HH visited by the WBPHCOT at least once in the past 12 months
- What were the age categories of the clients who were visited/received services from the WBPHCOT? [*select all that apply*]
  - Infants
  - Children
  - Adolescents/young adults
  - Adults
- What services were provided by the CHWs being observed today? [*select all that apply*]
  - HIV related services
    - Counselling/education of clients with unknown HIV status
    - Referrals for HIV testing
    - Distribution of HIV self- testing kits
    - Performance of HIV rapid test
    - Adherence assessment for patients on ART (pill counts, structured self-report, symptom check, other)
    - Adherence support for patients on ART (education, motivational interviewing, other)
    - Medication delivery
    - Defaulter tracking for HIV patients who have missed an appointment (clinical, lab, drug pick-up)
    - Referrals for facility-based clinical, laboratory and/or psychosocial support
    - Referrals for community-based clinical, laboratory and/or psychosocial support
    - Counselling/education (safer sex, condom use, family planning, other)

## Appendix G - Field Based Observation Data Collection Form

- Food and nutrition support
- Condom distribution
- Other HIV-related services, *specify*\_\_\_\_\_
- TB-related services
  - Symptom screening (e.g., structured questions)
  - Referrals for TB testing
  - Counselling/education (cough etiquette for patients with chronic cough)
  - Adherence *assessment* for TB patients on treatment and/or people on TB preventive treatment (TPT)
  - Adherence *support* for TB patients on treatment and/or people on TB preventive treatment (TPT)
  - Defaulter tracking for TB patients who have missed an appointment (clinical, lab, drug pick-up)
  - Other TB-related services, *specify*\_\_\_\_\_
- Reproductive health services
- Maternal child health services
- Non-communicable disease (NCD) services (hypertension, diabetes)
- Other, *specify*\_\_\_\_\_
